# Supplementary material
Source: MDPI journal article supplement (https://www.mdpi.com/1424-8247/14/7/657)

## Supplementary Material

### Design and synthesis of novel thiazolo[5,4-d]pyrimidine derivatives with high affinity for both the adenosine A<sub>1</sub> and A<sub>2A</sub> receptors, and efficacy in animal models of depression.

Flavia Varano <sup>1,\*</sup>, Daniela Catarzi <sup>1</sup>, Erica Vigiani <sup>1</sup>, Diego Dal Ben <sup>2</sup>, Michela Buccioni <sup>2</sup>, Gabriella Marucci <sup>2</sup>, Lorenzo Di Cesare Mannelli <sup>3</sup>, Elena Lucarini <sup>3</sup>, Carla Ghelardini <sup>3</sup>, Rosaria Volpini <sup>2</sup> and Vittoria Colotta <sup>1</sup>

<sup>1</sup> Dipartimento di Neuroscienze, Psicologia, Area del Farmaco e Salute del Bambino, Sezione di Farmaceutica e Nutraceutica, Università degli Studi di Firenze, Via Ugo Schiff 6, 50019 Sesto Fiorentino (FI), Italy; [daniela.catarzi@unifi.it](mailto:daniela.catarzi@unifi.it) (D.C.); [erica.vigiani@unifi.it](mailto:erica.vigiani@unifi.it) (E.V.); [vittoria.colotta@unifi.it](mailto:vittoria.colotta@unifi.it) (V.C.)

<sup>2</sup> Scuola di Scienze del Farmaco e dei Prodotti della Salute, Università degli Studi di Camerino, Via S. Agostino 1, 62032 Camerino, MC, Italy; [diego.dalben@unicam.it](mailto:diego.dalben@unicam.it) (D.D.B.); [michela.buccioni@unicam.it](mailto:michela.buccioni@unicam.it) (M.B.); [gabriella.marucci@unicam.it](mailto:gabriella.marucci@unicam.it) (G.M.); [rosaria.volpini@unicam.it](mailto:rosaria.volpini@unicam.it) (R.V.)

<sup>3</sup> Dipartimento di Neuroscienze, Psicologia, Area del Farmaco e Salute del Bambino, Sezione di Farmacologia, Università degli Studi di Firenze, Viale Pieraccini 5, 50139 Firenze, Italy; [lorenzo.mannelli@unifi.it](mailto:lorenzo.mannelli@unifi.it) (L.D.C.M.); [elena.lucarini@unifi.it](mailto:elena.lucarini@unifi.it) (E.L.) [carla.ghelardini@unifi.it](mailto:carla.ghelardini@unifi.it) (C.G.)

\* Correspondence: [flavia.varano@unifi.it](mailto:flavia.varano@unifi.it)

### Contents:

<sup>1</sup>H NMR and <sup>13</sup>C APT NMR spectra of some selected derivatives (8, 10, 11, 17, 18)

The <sup>13</sup>C APT (Attached Proton Test) experiment distinguishes between C-H multiplicities. CH and CH<sub>3</sub> vectors have opposite phases compared to C and CH<sub>2</sub>. Therefore, the phase of CH and CH<sub>3</sub> peaks is 180° different from C (including the solvent DMSO) and CH<sub>2</sub> peaks.

Compound 8

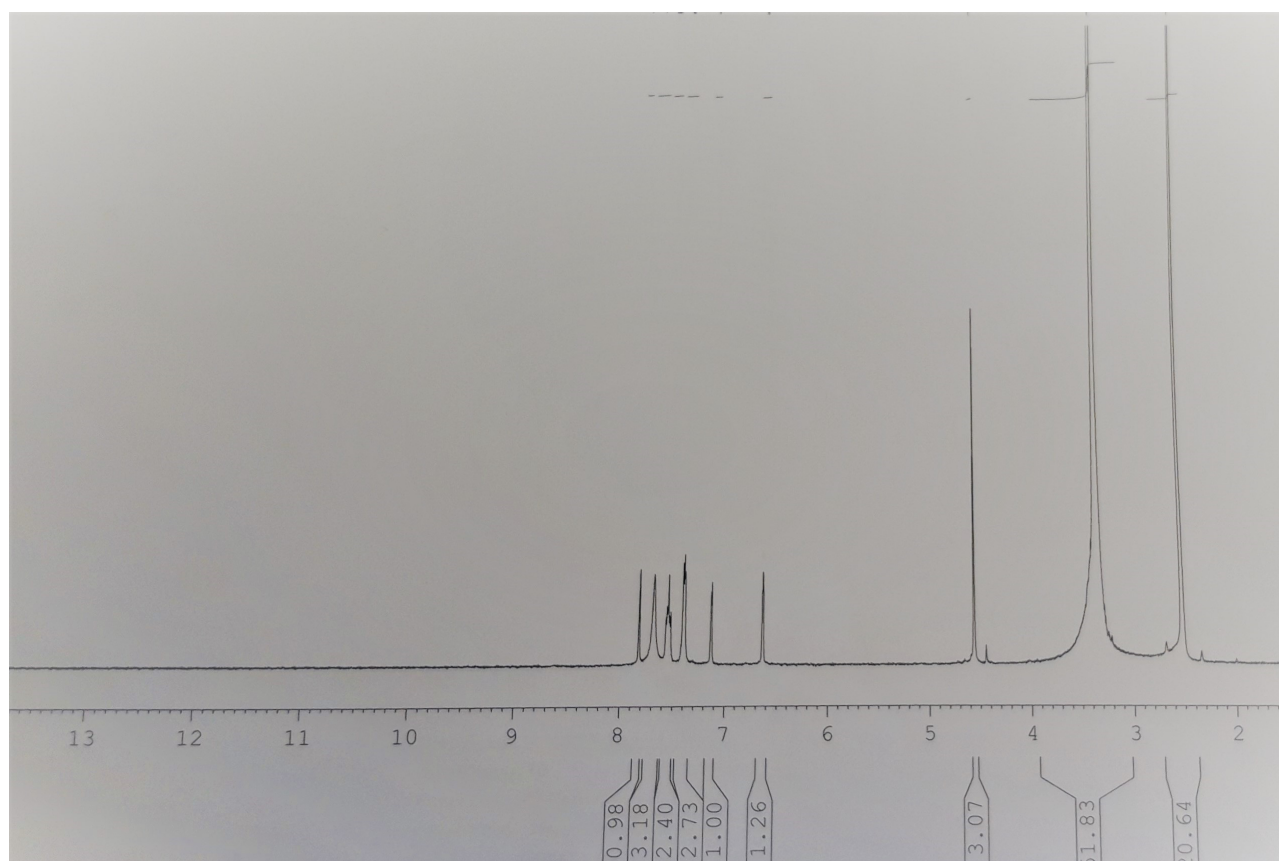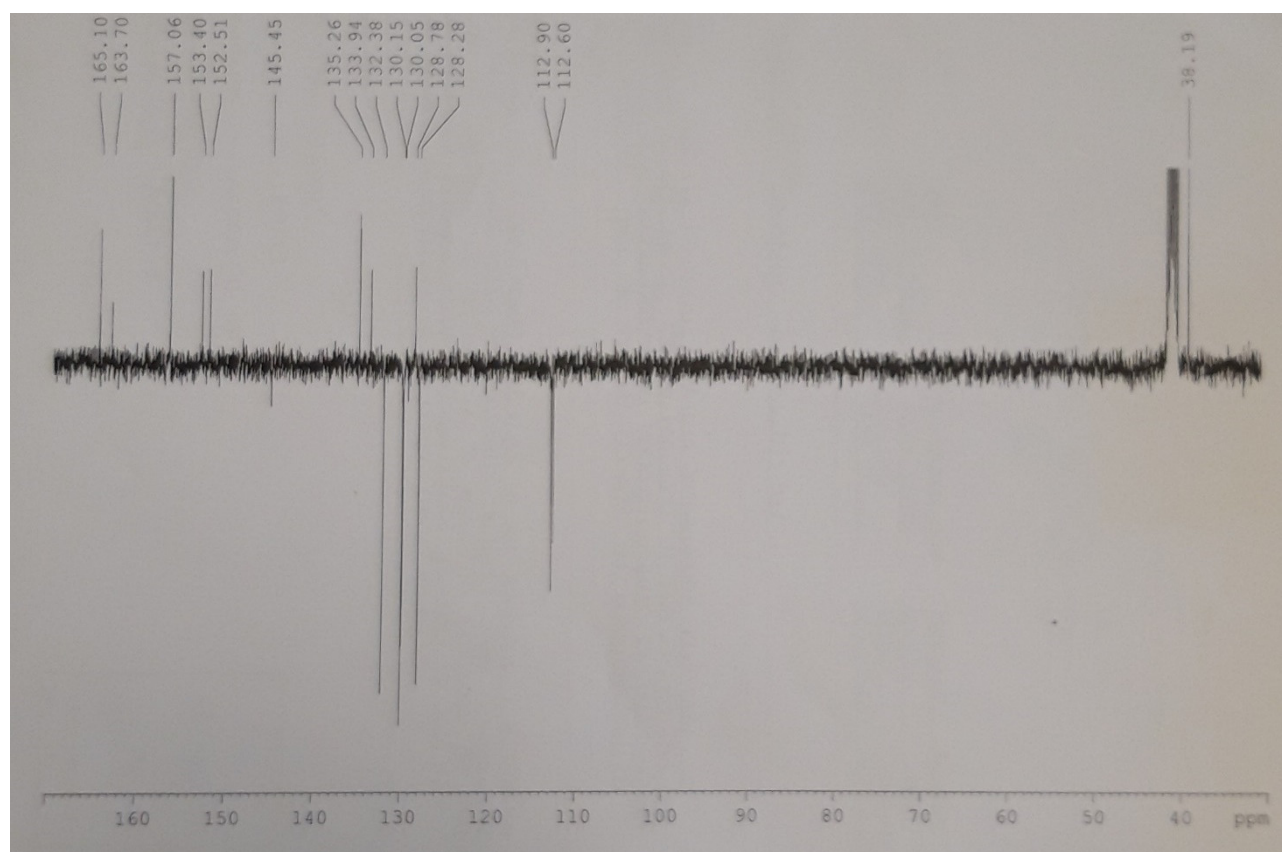

compound 10

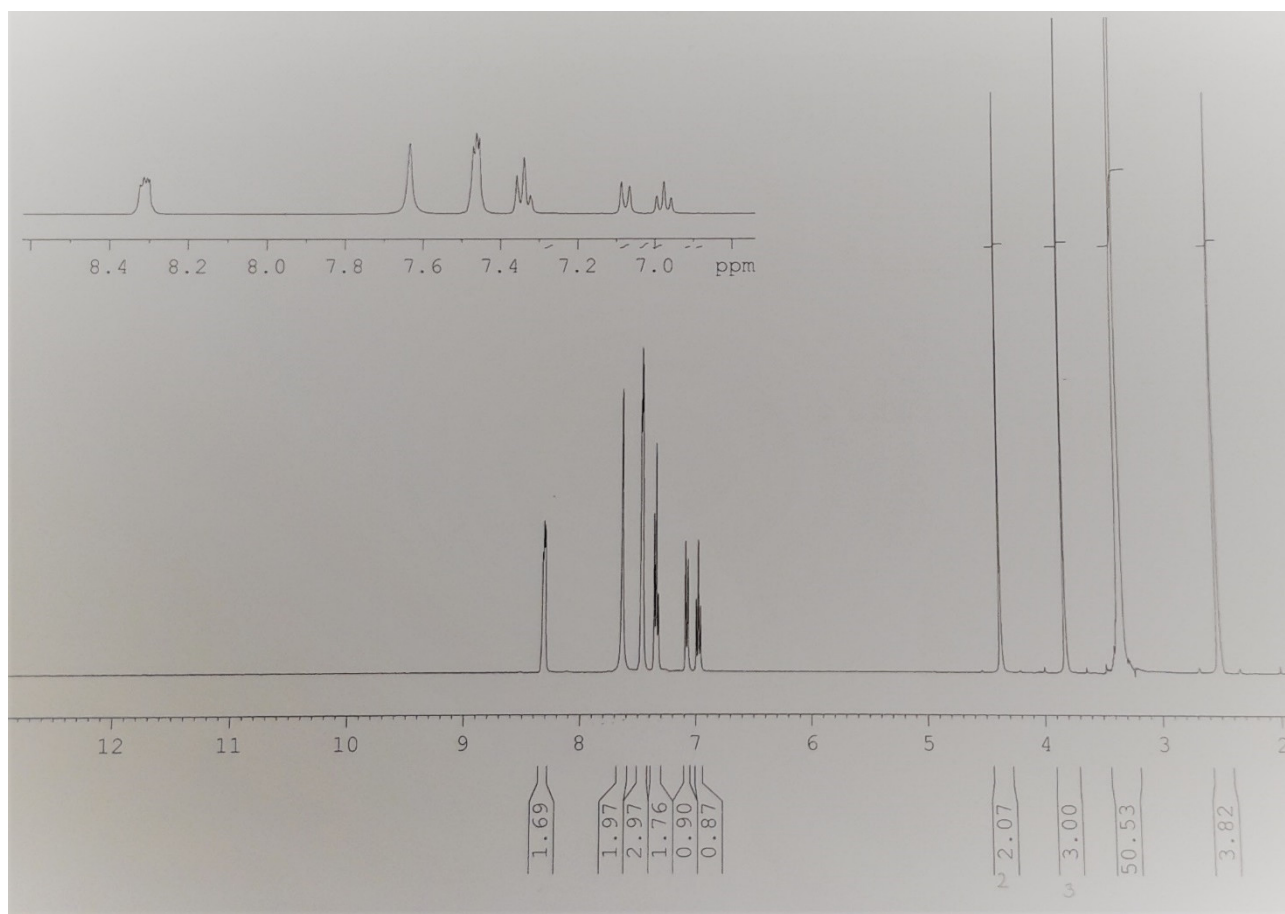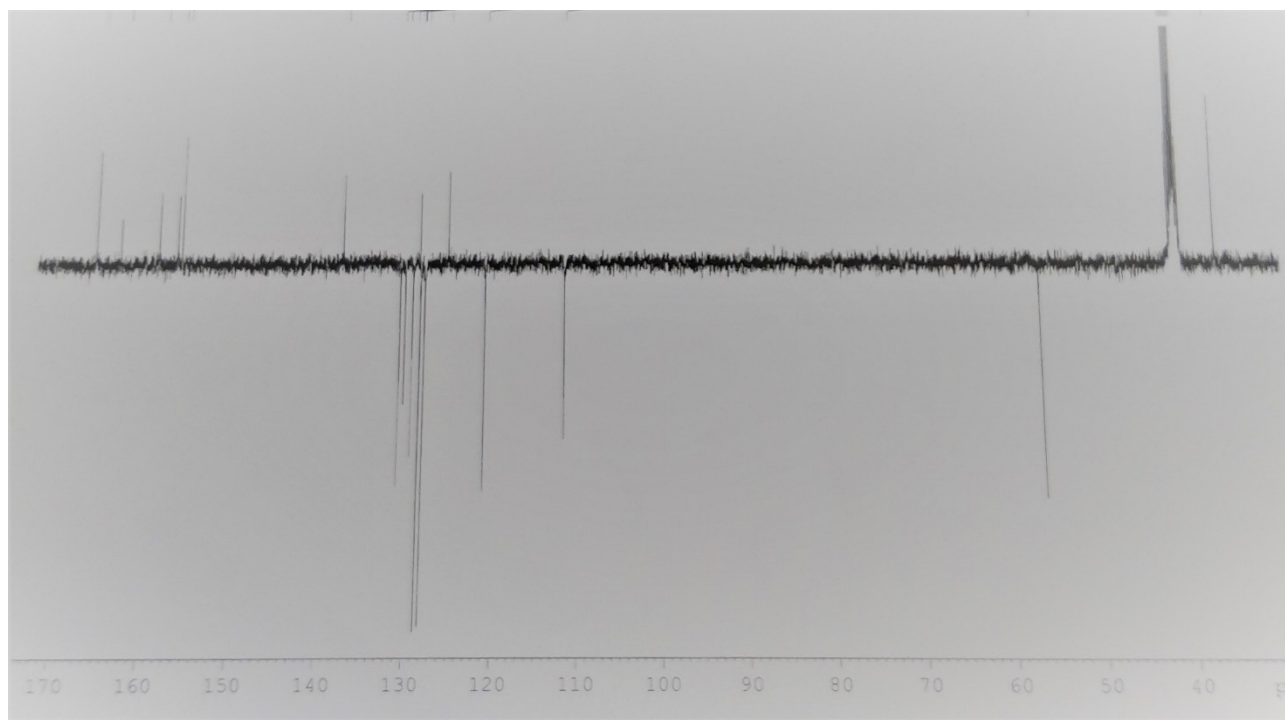

# Compound 11

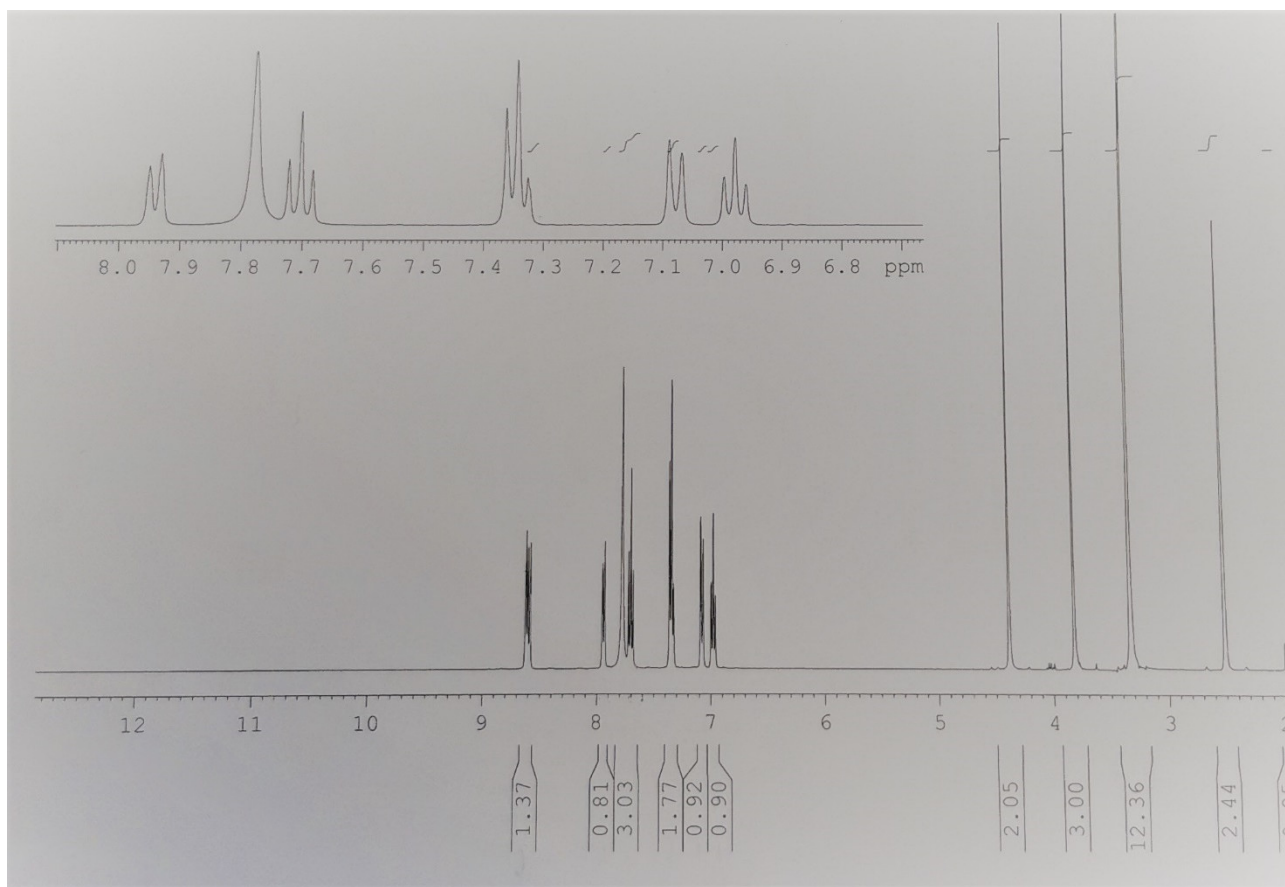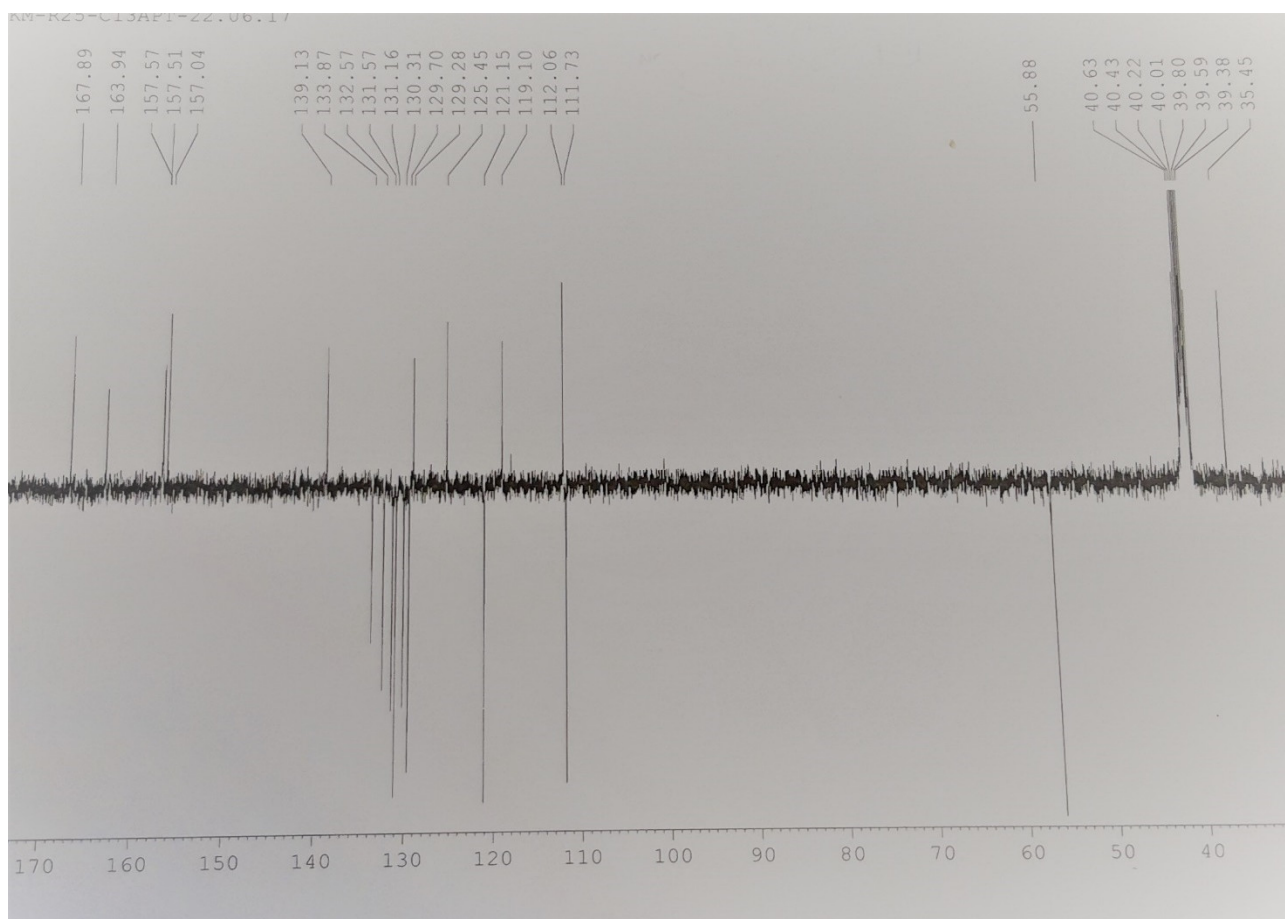



Compound 17

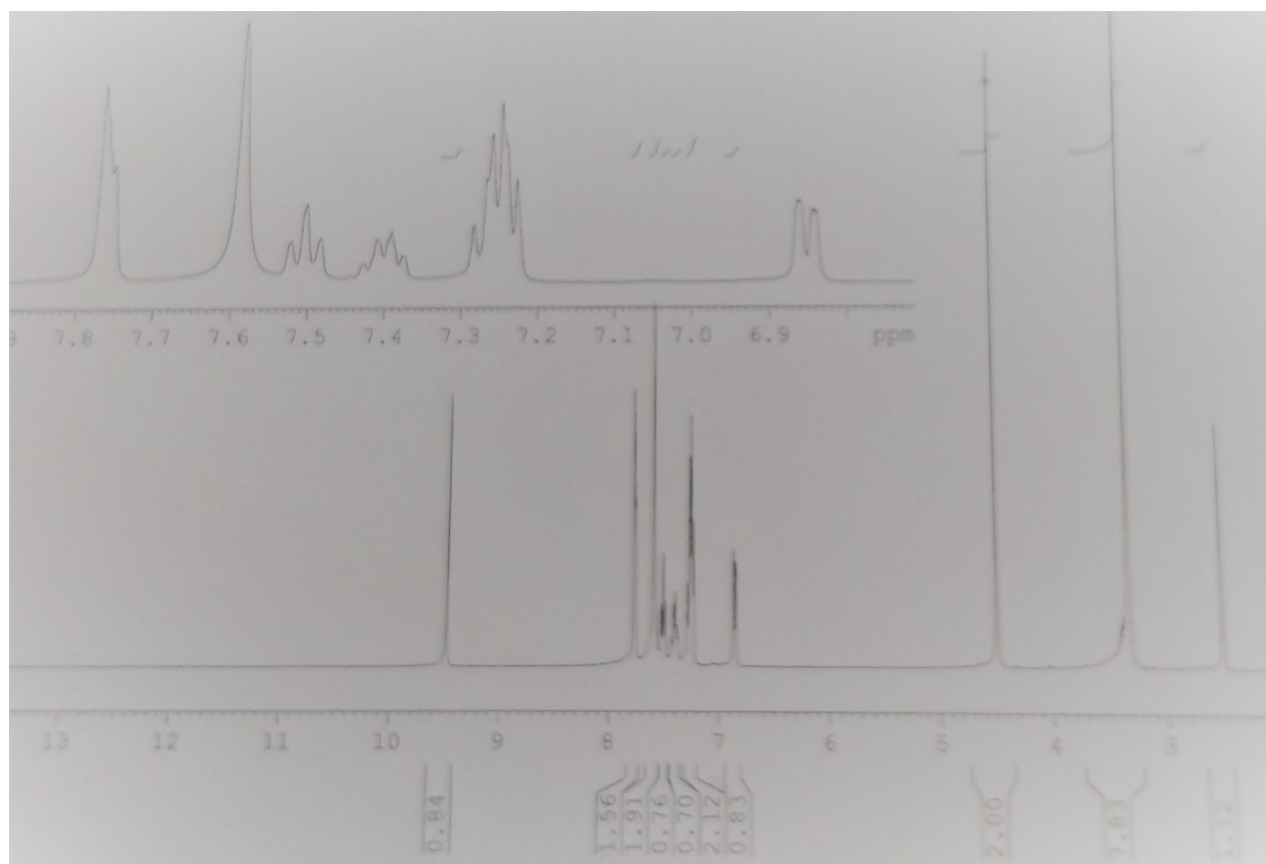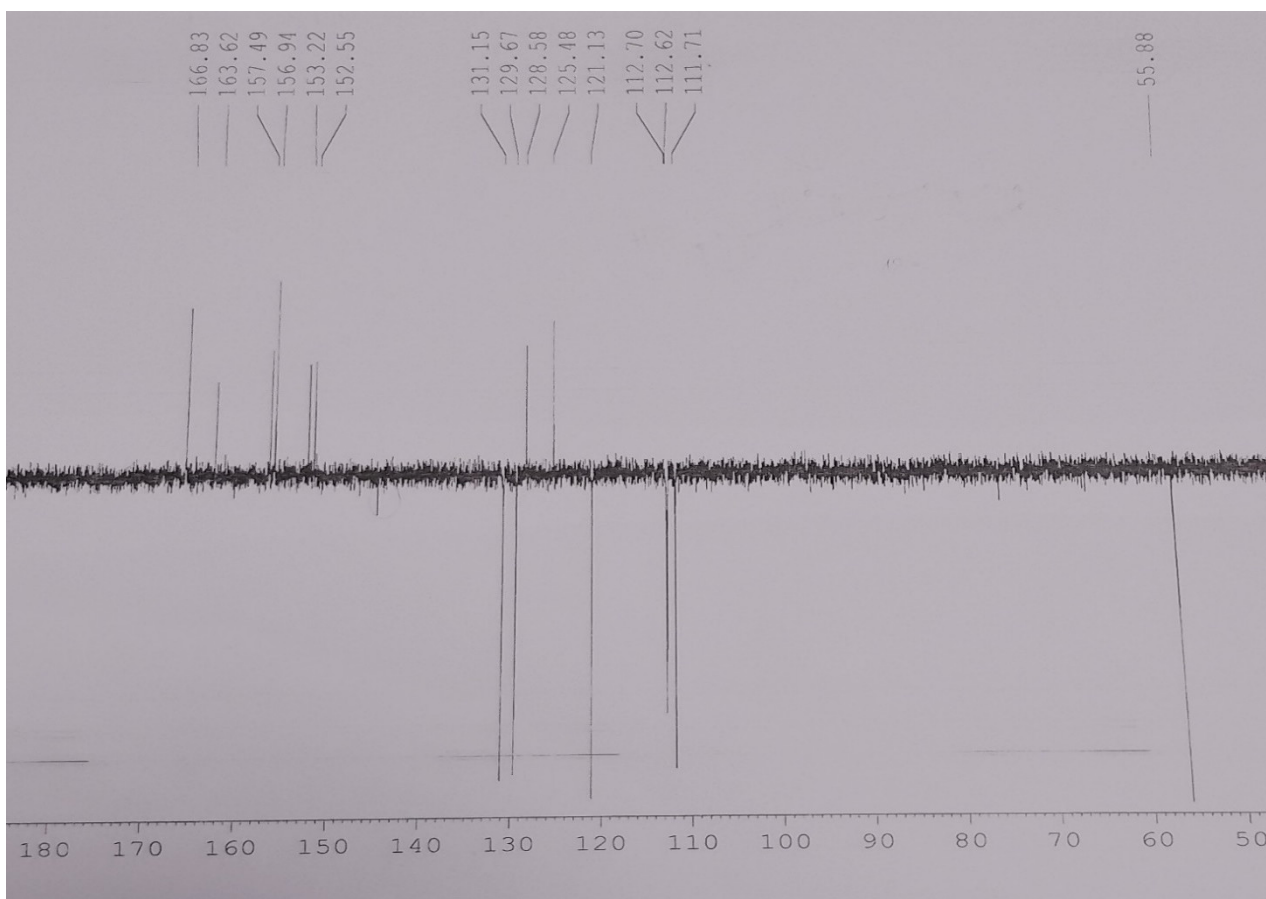

Compound 18

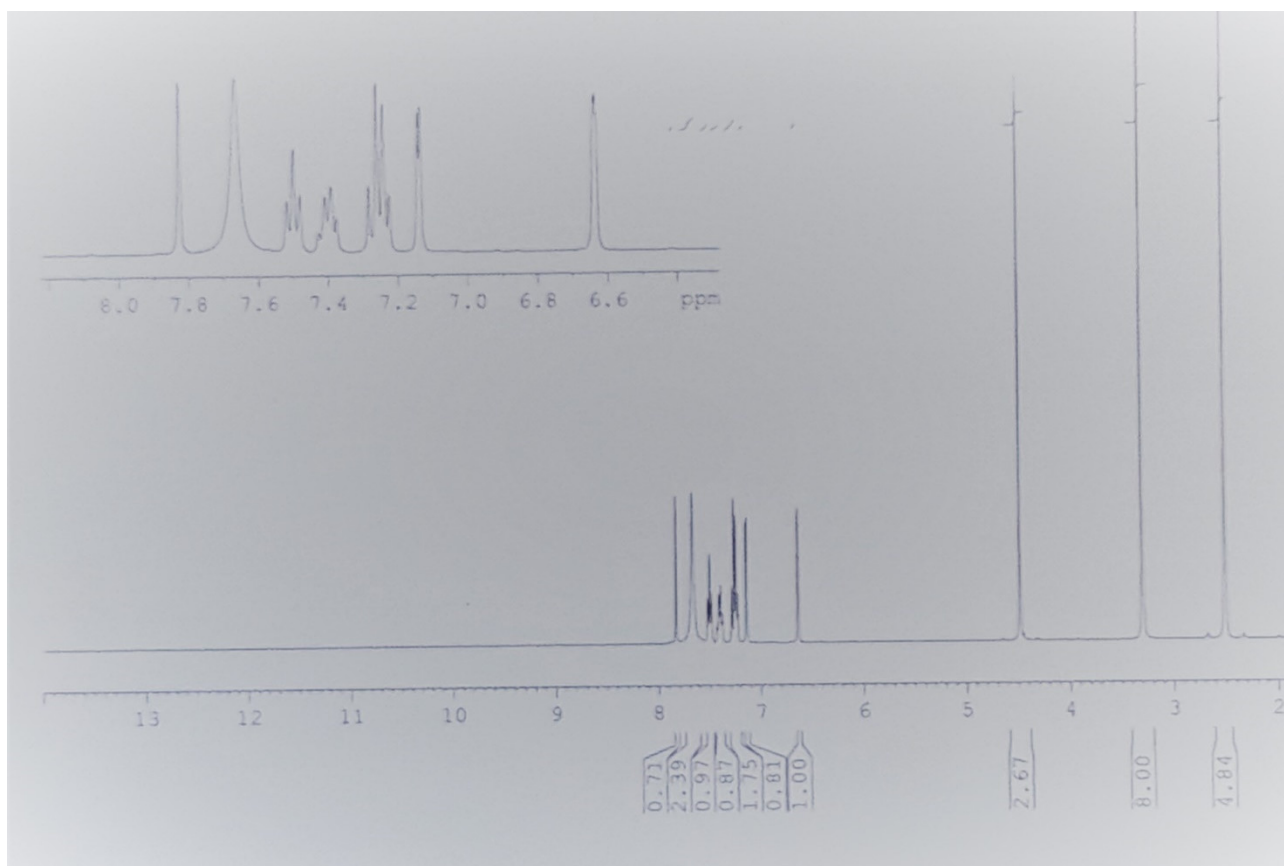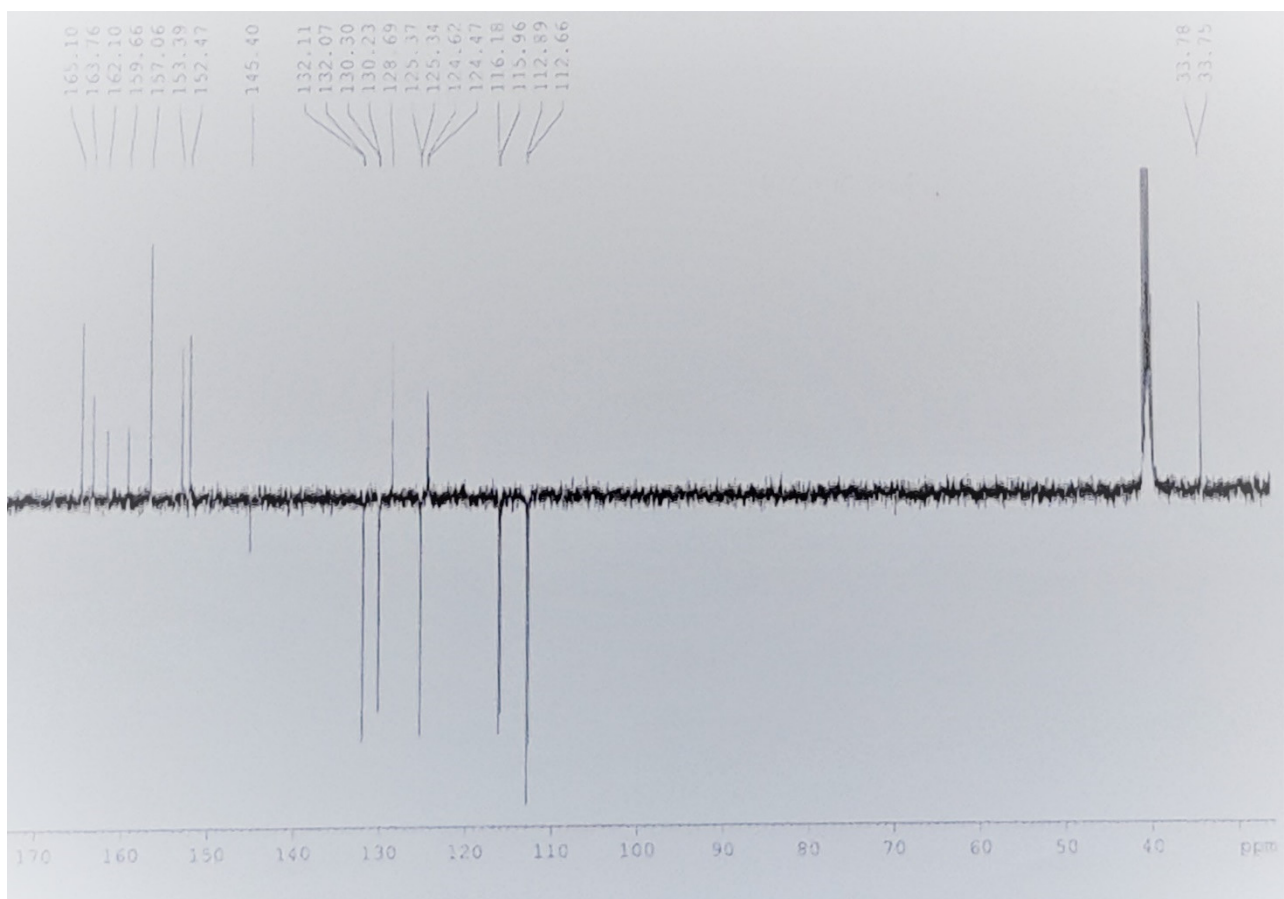

Supplement: s1 [file s1]
